# Supplementary figures and images for: Design, synthesis and anticancer activity of furochromone and benzofuran derivatives targeting VEGFR-2 tyrosine kinase
Source: Royal Society of Chemistry journal article supplement (doi:10.1039/c4ra16228e), 2015-01-01

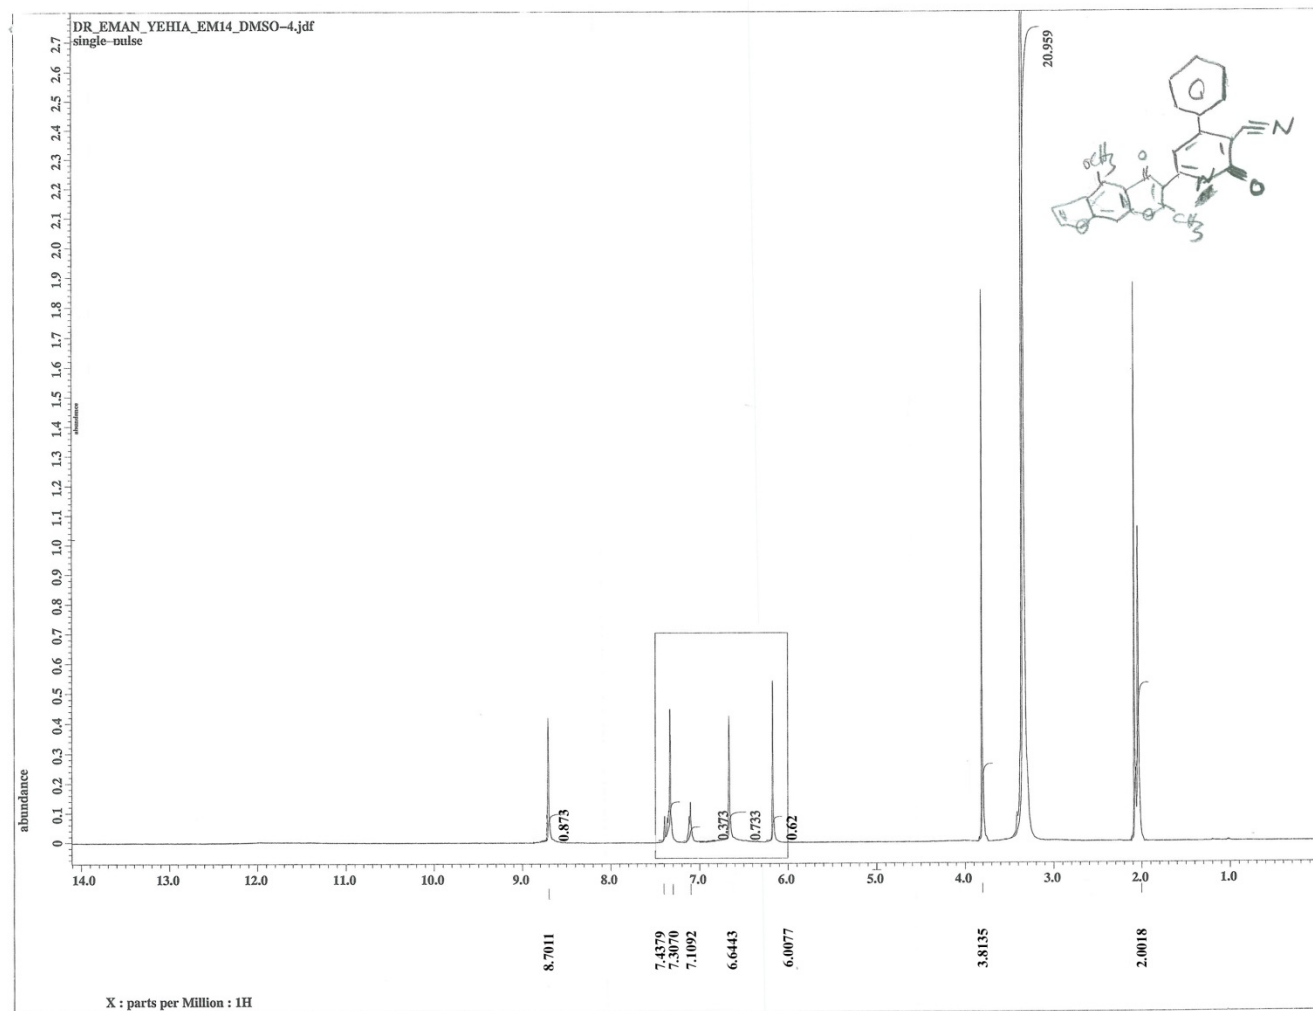

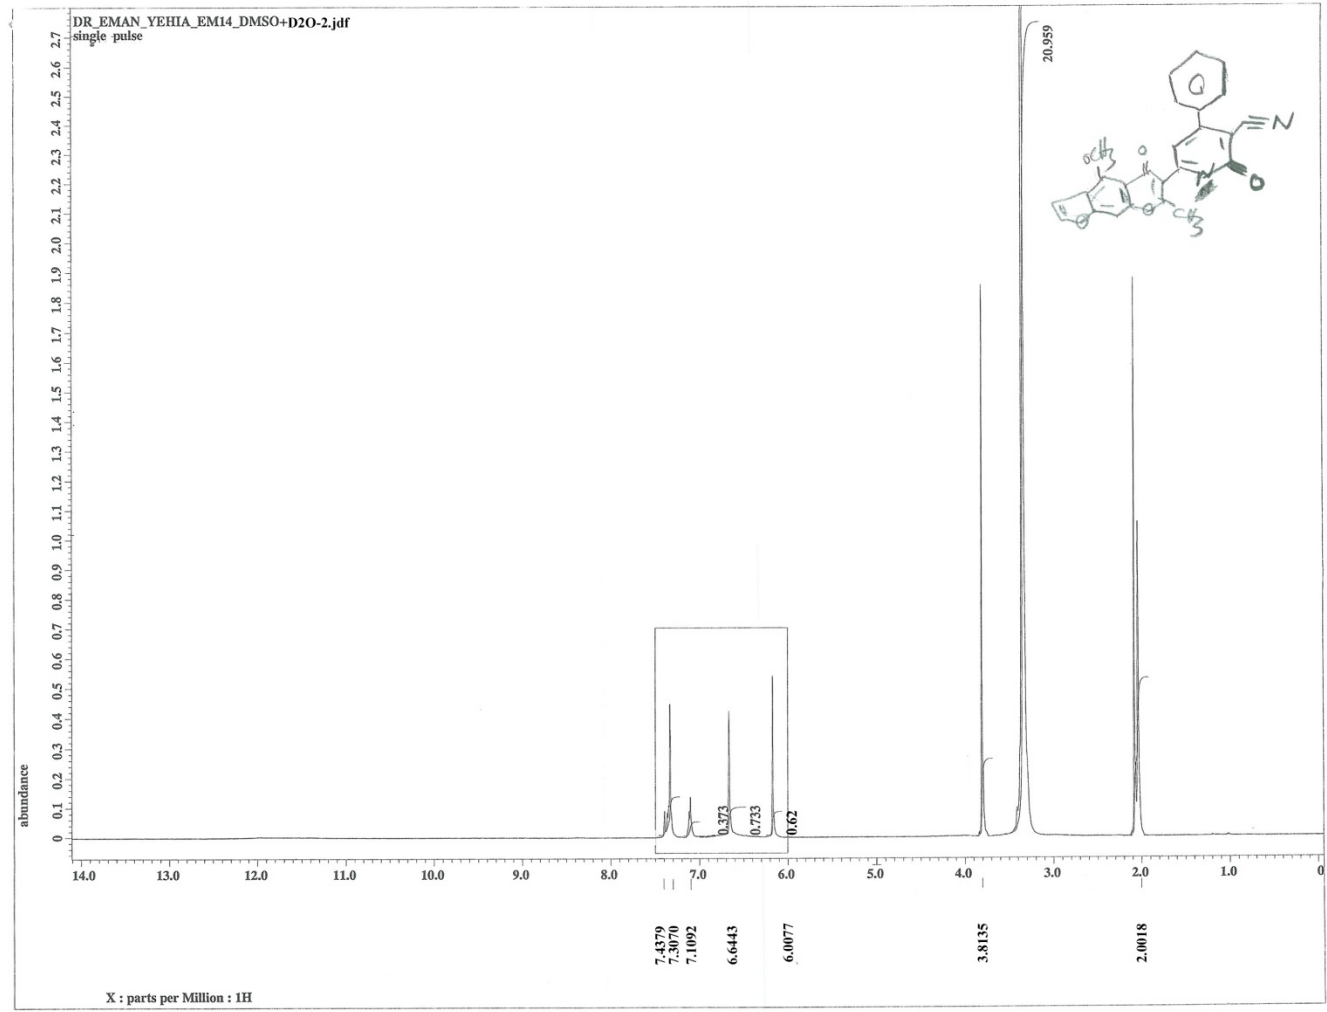

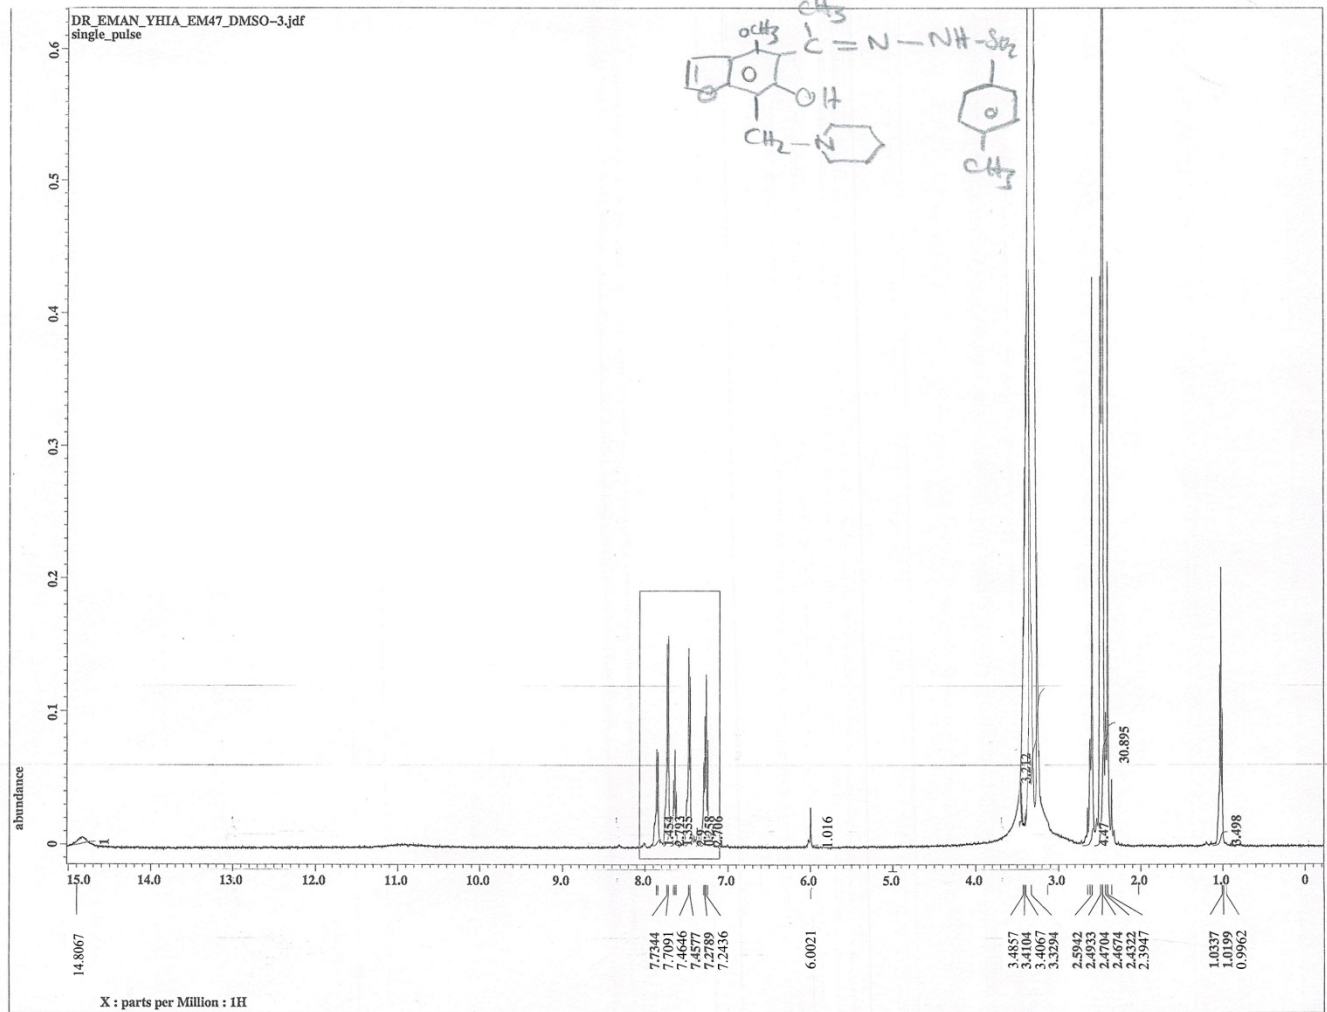

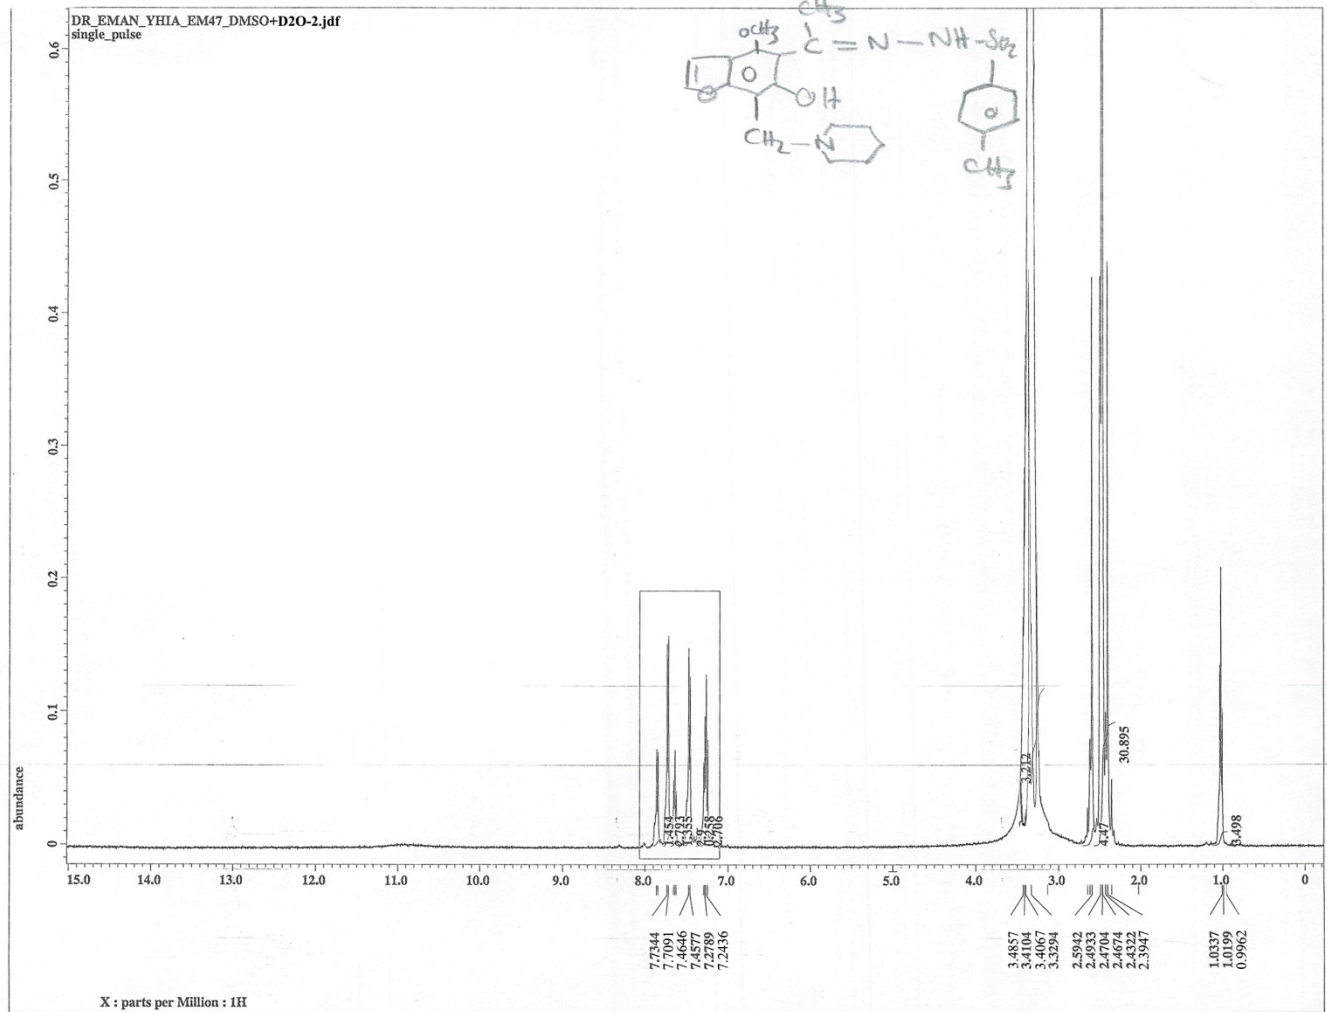

DR\_EMAN\_YHIA\_EM35\_DMSO+D2O-2.jdf  
single\_pulse

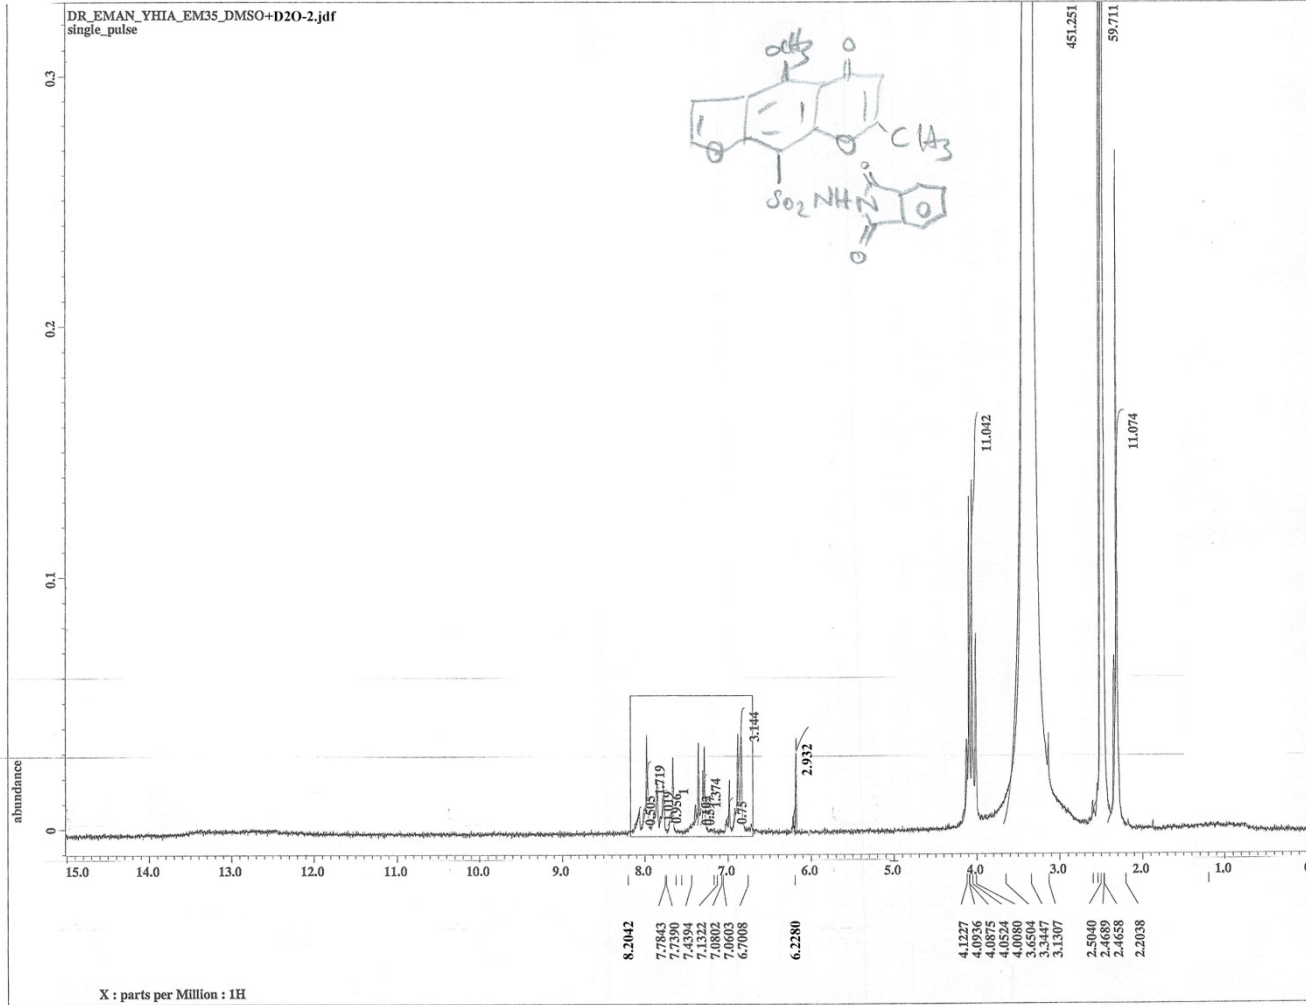

Supplement: c4ra16228e1.pdf [file c4ra16228e1.pdf]
